# Supplementary material for: Nutrient Dense, Low-Cost Foods Can Improve the Affordability and Quality of the New Zealand Diet—A Substitution Modeling Study
Source: Int J Environ Res Public Health. 2021 Jul 27;18(15):7950. doi: 10.3390/ijerph18157950 (PMC8345759; doi:10.3390/ijerph18157950)
Supplement: Supplementary file 1 [file ijerph-18-07950-s001.zip]

Archive with 7 entries (7 files):
- Kellogg_Cereal Economics_SUPPLEMENTARY METHODS S1_IJERPH_NZ_20210709.pdf
- Kellogg_Cereal Economics_SUPPLEMENTARY METHODS S2_IJERPH_NZ_20210709.pdf
- Kellogg_Cereal Economics_SUPPLEMENTARY TABLE S1_IJERPH_NZ_20210709.pdf
- Kellogg_Cereal Economics_SUPPLEMENTARY TABLE S2_IJERPH_NZ_20210709.pdf
- Kellogg_Cereal Economics_SUPPLEMENTARY TABLE S3_IJERPH_NZ_20210709.pdf
- Kellogg_Cereal Economics_SUPPLEMENTARY TABLE S4_IJERPH_NZ_20210709.pdf
- Kellogg_Cereal Economics_SUPPLEMENTARY TABLE S5_IJERPH_NZ_20210709.pdf
