# Supplementary material for: Nutrient Dense, Low-Cost Foods Can Improve the Affordability and Quality of the New Zealand Diet—A Substitution Modeling Study
Source: Int J Environ Res Public Health. 2021 Jul 27;18(15):7950. doi: 10.3390/ijerph18157950 (PMC8345759; doi:10.3390/ijerph18157950)
Supplement: Supplementary file 1 [file ijerph-18-07950-s001.zip › Kellogg_Cereal Economics_SUPPLEMENTARY TABLE S1_IJERPH_NZ_20210709.pdf]

**Supplementary Table S1.** Details and descriptions of all 61 food categories, including the Food Chapter each food category belongs to, according to the New Zealand FOODFiles Food Composition Database [19].

| Food chapter <sup>1</sup>  | Food category                                                      |                                                                                                                                                                    |
|----------------------------|--------------------------------------------------------------------|--------------------------------------------------------------------------------------------------------------------------------------------------------------------|
|                            | Name                                                               | Description                                                                                                                                                        |
| A Bakery products          | Breads and rolls, wholegrain <sup>2</sup> , fortified <sup>3</sup> | Bagels, bread, English muffins, and flat breads with additional fortification, all grains including gluten-free varieties                                          |
|                            | Breads and rolls, refined grain, fortified                         | White (including gluten-free) bagels, bread, English muffins, and flat breads with additional fortification                                                        |
|                            | Breads and rolls, wholegrain, unfortified                          | Bagels, bread, English muffins, and flat breads with no fortification, all grains including gluten-free varieties                                                  |
|                            | Breads and rolls, refined grain, unfortified                       | White (including gluten-free) bagels, bread, English muffins, and flat breads with no fortification                                                                |
|                            | Bakery desserts                                                    | Sweet buns, sweet biscuits, cakes, cupcakes, banana breads, sweet scones and muffins, pudding, pie, danishes, éclairs, doughnuts, pavlova                          |
|                            | Savoury biscuits                                                   | Crackers, wafers, rice cakes, and crispbreads                                                                                                                      |
| C Beverages, non-alcoholic | Fruit juices                                                       | Commercial and non-commercial juices                                                                                                                               |
|                            | Sweetened beverages                                                | Fruit drinks, cordials, soft drinks, flavoured mineral waters, sports drinks, and energy drinks                                                                    |
|                            | Liquid/fortified breakfast                                         | Milo prepared with milk, unfortified beverage flavourings prepared with milk, beverage bases unmixed, and breakfast cereal beverages                               |
|                            | Dairy milk substitutes                                             | Soy beverages and rice beverages including smoothies and milkshakes                                                                                                |
|                            | Flavoured milk                                                     | Iced coffee, milk with flavouring, milkshakes, thick-shakes, and fruit smoothies with milk                                                                         |
| D Breakfast cereals        | Breakfast cereal, RTE, fortified, sugar ≤ 15g/100g <sup>4</sup>    | Fortified ready-to-eat breakfast cereals and muesli varieties, with or without fruit and nuts, and lower in sugar. <i>E.g., Weet-bix, cornflakes, rice bubbles</i> |
|                            | Breakfast cereal, RTE, fortified, sugar > 15g but ≤30g/100g        | Fortified ready-to-eat breakfast cereals and muesli, with or without fruit and nuts higher in sugar. <i>E.g., All Bran, Special K</i>                              |

|   |                            |                                                                    |                                                                                                                                               |
|---|----------------------------|--------------------------------------------------------------------|-----------------------------------------------------------------------------------------------------------------------------------------------|
|   |                            | Breakfast cereal, RTE, unfortified, sugar $\leq$ 15g/100g          | Unfortified ready-to-eat breakfast cereals and muesli varieties, lower in sugar. <i>Eg, Puffed wheat, unfortified wheat biscuits</i>          |
|   |                            | Breakfast cereal, RTE unfortified, sugar > 15g but $\leq$ 30g/100g | Unfortified ready-to-eat breakfast cereals and muesli higher in sugar. <i>Eg, muesli, unfortified breakfast flakes with dried fruit added</i> |
|   |                            | Breakfast cereal, RTE, sugar > 30g/100g                            | Discretionary ready-to-eat breakfast cereals <i>Eg, Cocoa Pops</i>                                                                            |
|   |                            | Hot porridge                                                       | Porridge with and without (milk, sugar, honey and dried fruit)                                                                                |
| E | Cereals and pseudo-cereals | Pasta and noodles                                                  | Pasta and noodles, plain without additions                                                                                                    |
|   |                            | Pasta and noodles, with additions                                  | Pasta and noodles with additions, such as canned spaghetti in tomato sauce, ravioli, and macaroni cheese                                      |
|   |                            | Rice and grains                                                    | Rice, quinoa and couscous without additions                                                                                                   |
| F | Dairy                      | Dairy milk full-fat                                                | Fluid milk, condensed milk, and milk powder full-fat (3.3%)                                                                                   |
|   |                            | Dairy milk reduced fat                                             | Fluid milk, condensed milk, and milk powder, fat 1.5%                                                                                         |
|   |                            | Dairy milk skim                                                    | Fluid milk, condensed milk, and milk powder, fat <1%                                                                                          |
|   |                            | Yoghurt full-fat                                                   | Yoghurt, plain and sweetened varieties, > 3% fat                                                                                              |
|   |                            | Yoghurt reduced fat                                                | Yoghurt, plain and sweetened varieties, $\leq$ 3% fat                                                                                         |
|   |                            | Cream                                                              | Cream, sour cream, and whipped cream                                                                                                          |
|   |                            | Cheese                                                             | Cheese blocks and grated cheese, all varieties                                                                                                |
|   |                            | Cheese ultra-processed <sup>5</sup>                                | Cheese slices ('plastic cheese')                                                                                                              |
|   |                            | Ice-cream and ice-confections                                      | Ice-cream, sweetened ice desserts, gelato                                                                                                     |
|   |                            | Butter                                                             | Butter                                                                                                                                        |

|   |                      |                                      |                                                                                       |
|---|----------------------|--------------------------------------|---------------------------------------------------------------------------------------|
| G | Eggs                 | Eggs                                 | Eggs, without additions                                                               |
| J | Fats and oils        | Oils                                 | Vegetable and seed oils                                                               |
|   |                      | Margarine and margarine-like spreads | Dairy blends, margarines and table spreads                                            |
| K | Fin fishes           | Fresh fish                           | Fish (baked, boiled, roasted, smoked)                                                 |
|   |                      | Fish, battered and fried             | Fish (battered/crumbed and fried, including frozen)                                   |
|   |                      | Canned fish                          | Canned tuna, salmon, sardines, mackerel                                               |
| L | Fruits               | Fresh fruit                          | Raw fruits and fruit salads                                                           |
|   |                      | Commercial fruit, no added sugar     | Canned fruits (drained, with juice)                                                   |
|   |                      | Commercial fruit with added sugar    | Canned fruits (with syrup)                                                            |
|   |                      | Dried fruits                         | Dried fruits                                                                          |
| M | Meats                | Red meat, fat fully trimmed          | Beef, lamb, pork, veal, kangaroo with all fat removed                                 |
|   |                      | Red meat, fat semi or untrimmed      | Beef, lamb, pork, veal, kangaroo with fat still present, or only partially removed    |
|   |                      | Poultry                              | Chicken and duck                                                                      |
| N | Meat products        | Ultra-processed meats                | Bacon, ham, prosciutto, salami, corned beef, turkey deli-sliced, spam, and beef jerky |
|   |                      | Processed meats                      | Sausages (beef, pork, chicken), frankfurters, saveloys                                |
| Q | Nuts and seeds       | Nuts and seeds                       | Chia seeds, nuts (peanuts, almonds, pistachio, pine), nut butters                     |
| R | Recipes <sup>6</sup> | Batter-based products                | Crepes, pancakes, pikelet, waffles, fritters                                          |

|   |                                        |                                            |                                                                                                                                                                                          |
|---|----------------------------------------|--------------------------------------------|------------------------------------------------------------------------------------------------------------------------------------------------------------------------------------------|
| S | Sauces                                 | Dips                                       | Dairy-based dips, guacamole, and hummus                                                                                                                                                  |
|   |                                        | Sauces, cream-based                        | Cream/oil based sauces used frequently in the NZ diet, such as coconut cream, cream-based simmer sauces, and mayonnaise                                                                  |
|   |                                        | Sauces, tomato-based                       | Tomato-based sauces used frequently in the NZ diet, such as tomato sauce, canned tomatoes and tomato-based pasta sauce                                                                   |
| T | Shellfishes                            | Shellfish                                  | Crabs, prawns, scallops, squid                                                                                                                                                           |
| U | Savoury snack foods                    | Savoury snacks                             | Potato crisps, corn chips, popcorn, snack mixes, and 2-minute noodles                                                                                                                    |
| W | Sugars, confectionaries, sweet spreads | Sweet spreads and syrups                   | Sugar, honey, and maple syrups, jams and sweet spreads                                                                                                                                   |
|   |                                        | Sweet snacks                               | Chocolate, bars, licorice, honeycomb, lollies, marshmallows, muesli and cereal bars                                                                                                      |
| X | Vegetables and pulses                  | Potatoes, red kumara, and taro unprocessed | Baked, boiled, fried, grilled, or BBQ'd potatoes, Owairaka Red kumara and taro.                                                                                                          |
|   |                                        | Potatoes, red kumara and taro, processed   | Fries, hash-browns, and wedges (potatoes, Owairaka Red kumara and taro).                                                                                                                 |
|   |                                        | Orange/yellow vegetables                   | Carrots, orange/gold kumara, pumpkin                                                                                                                                                     |
|   |                                        | Green leafy vegetables                     | Lettuce, spinach, silverbeet, bok-choy, watercress                                                                                                                                       |
|   |                                        | Other vegetables                           | Broccoli, cabbage and cauliflower, leeks, onions, peas and beans, beetroot, root vegetables that are not orange or yellow, zucchini, tomato, mushrooms, onions, leeks, and green bananas |
|   |                                        | Vegetable dishes                           | Vegetable casseroles, vegetable curries, vegetable stir-fry, vegetable salads without additions, coleslaw, and potato salad                                                              |
|   |                                        | Meat substitutes/legumes and dishes        | Beans, lentils, baked beans plain and in (sauces, curry, salads and casseroles), tofu, and tempeh                                                                                        |

<sup>1</sup> Each food category can be matched to one of the food chapters outlined in the New Zealand Food Composition Database (25).

<sup>2</sup> Where specified, wholegrain versions of a food were grouped together; thus, refined versions of a food were also grouped together.

<sup>3</sup> Where specified, fortified foods were grouped together; non-fortified foods were thus also grouped together.

<sup>4</sup> Where applicable, classifications based on nutritional properties were used: High or moderate fat foods were grouped together, and reduced or skimmed versions of a food were grouped together; Foods with a similar sugar content were grouped together; Foods high in sugar and classified as discretionary were grouped together.

<sup>5</sup> Where possible, foods within each level of processing (NOVA classification) were grouped together.

<sup>6</sup> A selection of foods were excluded. These were: mixed dishes and takeaway foods, due to them containing more than one other food category and therefore creating added complexity that would be unfeasible to model; organ meats and offal, due to a low frequency of consumption; tea and coffee, due to contributing negligible calories to the diet.; water, due to contributing negligible calories to the diet; alcohol, due to contributing negligible nutrients to the diet; supplements, due to contributing negligible calories to the diet; infant formula and baby foods, due to no household member being an infant or baby.
