# Supplementary material for: Nutrient Dense, Low-Cost Foods Can Improve the Affordability and Quality of the New Zealand Diet—A Substitution Modeling Study
Source: Int J Environ Res Public Health. 2021 Jul 27;18(15):7950. doi: 10.3390/ijerph18157950 (PMC8345759; doi:10.3390/ijerph18157950)
Supplement: Supplementary file 1 [file ijerph-18-07950-s001.zip › Kellogg_Cereal Economics_SUPPLEMENTARY TABLE S2_IJERPH_NZ_20210709.pdf]

**Supplementary Table S2.** Nutrient density (NRF9.3/100 kcal), cost (NZD/100 kcal) and the nutrient density to cost ratio (with quartile rankings) for all 61 food categories. The classification according to the NOVA processing levels is also shown.

| Food categories <sup>1</sup>                         | NRF9.3/100 kcal | \$/100 kcal | Nutrient density to cost ratio <sup>2</sup> | Quartile | Processing Level (NOVA) |
|------------------------------------------------------|-----------------|-------------|---------------------------------------------|----------|-------------------------|
| <b>Vegetables</b>                                    |                 |             |                                             |          |                         |
| Other vegetables                                     | 355.69 (162.8)  | 1.31 (0.8)  | 337.86 (179.9)                              | 1        | Unprocessed             |
| Orange/yellow vegetables                             | 205.28 (88.1)   | 0.93 (0.3)  | 324.29 (335.0)                              | 1        | Unprocessed             |
| Potatoes, red kumara, and taro, unprocessed          | 96.38 (19.9)    | 0.57 (0.3)  | 196.05 (77.7)                               | 1        | Unprocessed             |
| Vegetable dishes                                     | 99.74 (90.8)    | 0.64 (0.4)  | 183.22 (192.9)                              | 1        | Ultra-processed         |
| Green leafy vegetables                               | 428.45 (181.2)  | 7.10 (4.8)  | 72.06 (30.8)                                | 2        | Unprocessed             |
| <b>Fruit</b>                                         |                 |             |                                             |          |                         |
| Fruit juices                                         | 272.15 (105.8)  | 0.71 (0.3)  | 415.97 (102.7)                              | 1        | Processed               |
| Fresh fruit                                          | 116.57 (106.8)  | 0.72 (0.4)  | 159.12 (84.2)                               | 1        | Unprocessed             |
| Dried fruit                                          | 24.25 (4.2)     | 0.21 (0.1)  | 126.80 (46.0)                               | 1        | Unprocessed             |
| Commercial fruit, no added sugar                     | 88.93 (46.4)    | 0.76 (0.1)  | 122.07 (78.2)                               | 2        | Processed               |
| Commercial fruit with added sugar                    | 48.85 (33.2)    | 0.47 (0.1)  | 103.02 (62.6)                               | 2        | Ultra-processed         |
| <b>Cereals and grain foods</b>                       |                 |             |                                             |          |                         |
| Hot porridge                                         | 27.51 (9.8)     | 0.18 (0.1)  | 245.98 (153.6)                              | 1        | Unprocessed             |
| Pasta and noodles                                    | 14.16 (6.8)     | 0.19 (0.2)  | 180.91 (137.1)                              | 1        | Unprocessed             |
| Breads and rolls, wholegrain, fortified              | 19.43 (2.2)     | 0.14 (0.0)  | 150.51 (55.1)                               | 1        | Ultra-processed         |
| Breakfast cereal, RTE, unfortified, sugar <15g/100g  | 23.14 (0.0)     | 0.16 (0.0)  | 148.88 (3.5)                                | 1        | Ultra-processed         |
| Breakfast cereal, RTE, fortified, sugar 15-30g/100g  | 46.41 (19.8)    | 0.31 (0.0)  | 148.35 (58.4)                               | 1        | Ultra-processed         |
| Rice and grains                                      | 10.53 (6.3)     | 0.08 (0.0)  | 136.35 (70.3)                               | 1        | Unprocessed             |
| Breakfast cereal, RTE, fortified, sugar <15g/100g    | 23.36 (21.7)    | 0.18 (0.0)  | 121.30 (100.6)                              | 2        | Ultra-processed         |
| Breads and rolls, wholegrain, unfortified            | 19.97 (4.9)     | 0.27 (0.1)  | 80.63 (31.6)                                | 2        | Ultra-processed         |
| Breads and rolls, refined grain, fortified           | 7.35 (0.0)      | 0.13 (0.0)  | 60.31 (20.0)                                | 3        | Ultra-processed         |
| Breakfast cereal, RTE unfortified, sugar 15-30g/100g | 10.80 (5.7)     | 0.19 (0.0)  | 58.03 (33.8)                                | 3        | Ultra-processed         |

|                                               |              |            |                |   |                 |
|-----------------------------------------------|--------------|------------|----------------|---|-----------------|
| Breads and rolls, refined grain, unfortified  | 12.01 (0.4)  | 0.27 (0.1) | 46.51 (12.9)   | 3 | Ultra-processed |
| Pasta and noodles, with additions             | 10.62 (14.0) | 0.68 (0.3) | 15.64 (13.4)   | 4 | Ultra-processed |
| Batter-based products                         | 4.54 (9.1)   | 0.68 (0.2) | 6.60 (9.9)     | 4 | Ultra-processed |
| <b>Milk, yoghurt, cheese and alternatives</b> |              |            |                |   |                 |
| Dairy milk skim                               | 68.93 (6.3)  | 0.56 (0.1) | 124.52 (15.6)  | 2 | Unprocessed     |
| Dairy milk reduced fat                        | 46.55 (0.0)  | 0.44 (0.0) | 107.85 (12.1)  | 2 | Unprocessed     |
| Liquid/fortified breakfast                    | 38.47 (50.7) | 0.59 (0.3) | 90.48 (96.9)   | 2 | Ultra-processed |
| Dairy milk full-fat                           | 28.47 (0.0)  | 0.34 (0.0) | 85.23 (9.6)    | 2 | Unprocessed     |
| Dairy milk substitutes                        | 60.16 (76.9) | 0.95 (0.3) | 59.74 (57.7)   | 3 | Ultra-processed |
| Cheese                                        | 12.90 (4.4)  | 0.28 (0.0) | 45.97 (10.3)   | 3 | Processed       |
| Yoghurt full-fat                              | 27.26 (10.2) | 0.63 (0.2) | 42.52 (10.2)   | 3 | Unprocessed     |
| Yoghurt reduced fat                           | 33.89 (30.9) | 0.69 (0.2) | 42.06 (26.7)   | 3 | Ultra-processed |
| Flavoured milk                                | 9.97 (9.1)   | 0.37 (0.1) | 23.46 (21.9)   | 3 | Ultra-processed |
| Cheese ultra-processed                        | -0.35 (3.5)  | 0.45 (0.2) | 1.81 (4.2)     | 4 | Ultra-processed |
| <b>Meat and alternatives</b>                  |              |            |                |   |                 |
| Nuts and seeds                                | 35.45 (11.8) | 0.11 (0.0) | 303.61 (50.7)  | 1 | Unprocessed     |
| Eggs                                          | 50.91 (0.0)  | 0.43 (0.1) | 125.93 (26.8)  | 2 | Unprocessed     |
| Meat substitutes/legumes and dishes           | 46.54 (15.6) | 0.61 (0.6) | 123.14 (65.2)  | 2 | Unprocessed     |
| Poultry                                       | 26.63 (13.3) | 0.45 (0.3) | 64.79 (24.2)   | 2 | Unprocessed     |
| Canned fish                                   | 34.75 (5.3)  | 0.87 (0.5) | 56.34 (36.5)   | 3 | Processed       |
| Shellfish                                     | 64.64 (16.3) | 1.66 (0.5) | 40.53 (8.2)    | 3 | Unprocessed     |
| Fresh fish                                    | 41.03 (17.5) | 2.38 (1.4) | 30.82 (32.4)   | 3 | Unprocessed     |
| Red meat, fat fully trimmed                   | 32.82 (11.8) | 1.56 (0.4) | 22.40 (10.5)   | 4 | Unprocessed     |
| Red meat, fat semi or untrimmed               | -6.34 (18.3) | 0.73 (0.2) | 7.61 (8.9)     | 4 | Unprocessed     |
| <b>Other foods</b>                            |              |            |                |   |                 |
| Oils                                          | 2.87 (4.8)   | 0.04 (0.0) | 138.54 (103.9) | 1 | Culinary        |
| Margarine and margarine-like spreads          | 9.12 (9.6)   | 0.08 (0.0) | 102.83 (63.0)  | 2 | Culinary        |
| <b>Discretionary foods</b>                    |              |            |                |   |                 |

|                                           |               |            |               |   |                 |
|-------------------------------------------|---------------|------------|---------------|---|-----------------|
| Potatoes, red kumara, and taro, processed | 25.39 (10.3)  | 0.24 (0.1) | 129.20 (81.4) | 1 | Ultra-processed |
| Sauces, tomato-based                      | 64.16 (43.1)  | 0.70 (0.4) | 98.70 (35.0)  | 2 | Ultra-processed |
| Breakfast cereal, RTE, sugar >30g/100g    | 20.40 (10.3)  | 0.36 (0.1) | 80.58 (74.0)  | 2 | Ultra-processed |
| Sweetened beverages                       | 14.71 (53.5)  | 2.47 (3.1) | 49.46 (74.6)  | 3 | Ultra-processed |
| Sweet snacks                              | 4.98 (22.6)   | 0.28 (0.0) | 44.35 (34.6)  | 3 | Ultra-processed |
| Dips                                      | 24.24 (23.5)  | 0.70 (0.3) | 38.90 (32.3)  | 3 | Ultra-processed |
| Fish, battered and fried                  | 21.17 (0.0)   | 0.74 (0.1) | 29.27 (4.0)   | 3 | Ultra-processed |
| Savoury snacks                            | 0.66 (4.9)    | 0.19 (0.1) | 11.75 (12.6)  | 4 | Ultra-processed |
| Savoury biscuits                          | 0.51 (6.2)    | 0.29 (0.1) | 7.82 (8.6)    | 4 | Ultra-processed |
| Butter                                    | 0.56 (0.9)    | 0.14 (0.0) | 3.95 (5.8)    | 4 | Culinary        |
| Cream                                     | -9.23 (2.0)   | 0.32 (0.2) | 0.00 (0.0)    | 4 | Culinary        |
| Ultra-processed meats                     | -10.87 (6.7)  | 0.53 (0.2) | 0.00 (0.0)    | 4 | Ultra-processed |
| Ice-cream and ice-confections             | -11.73 (7.0)  | 0.14 (0.1) | 0.00 (0.0)    | 4 | Ultra-processed |
| Sauces, cream-based                       | -12.15 (7.2)  | 0.27 (0.1) | 0.00 (0.0)    | 4 | Ultra-processed |
| Bakery desserts                           | -15.26 (13.3) | 0.25 (0.1) | 0.00 (0.0)    | 4 | Ultra-processed |
| Sweet spreads and syrups                  | -18.40 (12.5) | 0.24 (0.1) | 0.00 (0.0)    | 4 | Ultra-processed |
| Processed meats                           | -20.28 (6.4)  | 0.58 (0.2) | 0.00 (0.0)    | 4 | Processed       |

<sup>1</sup> All data is presented as mean (SEM).

<sup>2</sup> The nutrient density to cost ratio was calculated according to the following formula: (mean NRF9.3/100 kcal) / (mean cost/100 kcal). The nutrient density-to-cost ratio for a food category is the mean of the ratios of the representative foods within each food category.
