# Supplementary material for: Nutrient Dense, Low-Cost Foods Can Improve the Affordability and Quality of the New Zealand Diet—A Substitution Modeling Study
Source: Int J Environ Res Public Health. 2021 Jul 27;18(15):7950. doi: 10.3390/ijerph18157950 (PMC8345759; doi:10.3390/ijerph18157950)
Supplement: Supplementary file 1 [file ijerph-18-07950-s001.zip › Kellogg_Cereal Economics_SUPPLEMENTARY TABLE S5_IJERPH_NZ_20210709.pdf]

**Supplementary Table S5.** Individual component scores for the HEIFA-2013 (A) and DICE (B), for each ethnic group of both low and middle socioeconomic households.

**A.**

| HEIFA-2013 Scores <sup>1</sup> | Low socioeconomic household |                |                              | Medium socioeconomic household |                |                              |
|--------------------------------|-----------------------------|----------------|------------------------------|--------------------------------|----------------|------------------------------|
|                                | Current diet                | Healthier diet | <i>p</i> -value <sup>2</sup> | Current diet                   | Healthier diet | <i>p</i> -value <sup>2</sup> |
| <b>Māori</b>                   |                             |                |                              |                                |                |                              |
| n                              | 197                         | 197            |                              | 49                             | 49             |                              |
| Component 1: Discretionary     | 4.0 (0.3)                   | 10.0 (0.0)     | <0.001                       | 5.0 (0.7)                      | 10.0 (0.0)     | <0.001                       |
| Component 2: Vegetables        | 1.9 (0.2)                   | 3.2 (0.2)      | <0.001                       | 1.7 (0.4)                      | 3.2 (0.4)      | 0.005                        |
| Component 3: Fruits            | 1.8 (0.2)                   | 6.2 (0.3)      | <0.001                       | 3.2 (0.5)                      | 7.2 (0.4)      | <0.001                       |
| Component 4: Grains            | 2.3 (0.2)                   | 5.2 (0.2)      | <0.001                       | 3.1 (0.4)                      | 5.4 (0.5)      | <0.001                       |
| Component 5: Meat              | 4.3 (0.3)                   | 5.3 (0.3)      | 0.017                        | 3.9 (0.6)                      | 5.0 (0.6)      | 0.198                        |
| Component 6: Dairy             | 2.3 (0.2)                   | 2.9 (0.2)      | 0.060                        | 2.6 (0.4)                      | 3.0 (0.5)      | 0.470                        |
| Component 7: Water             | 5.0 (0.0)                   | 5.0 (0.0)      | -                            | 5.0 (0.0)                      | 5.0 (0.0)      | -                            |
| Component 8: Fat               | 1.8 (0.2)                   | 8.3 (0.1)      | <0.001                       | 1.7 (0.3)                      | 8.3 (0.3)      | <0.001                       |
| Component 9: Sodium            | 6.3 (0.3)                   | 10.0 (0.0)     | <0.001                       | 6.1 (0.6)                      | 10.0 (0.0)     | <0.001                       |
| Component 10: Added sugars     | 7.2 (0.3)                   | 10.0 (0.0)     | <0.001                       | 7.0 (0.6)                      | 10.0 (0.0)     | <0.001                       |
| Component 11: Alcohol          | 5.0 (0.0)                   | 5.0 (0.0)      | -                            | 5.0 (0.0)                      | 5.0 (0.0)      | -                            |
| HEIFA-2013 TOTAL SCORE         | 41.9 (0.8)                  | 71.1 (0.8)     | <0.001                       | 44.2 (1.7)                     | 72.1 (1.5)     | <0.001                       |
| <b>Pacific</b>                 |                             |                |                              |                                |                |                              |
| n                              | 177                         | 177            |                              | 33                             | 33             |                              |
| Component 1: Discretionary     | 5.2 (0.3)                   | 10.0 (0.0)     | <0.001                       | 4.6 (0.8)                      | 10.0 (0.0)     | <0.001                       |
| Component 2: Vegetables        | 2.8 (0.2)                   | 3.5 (0.2)      | 0.011                        | 2.7 (0.5)                      | 3.4 (0.5)      | 0.330                        |
| Component 3: Fruits            | 2.0 (0.2)                   | 5.9 (0.3)      | <0.001                       | 2.4 (0.5)                      | 6.0 (0.7)      | <0.001                       |
| Component 4: Grains            | 3.2 (0.2)                   | 5.9 (0.3)      | <0.001                       | 3.1 (0.5)                      | 5.4 (0.6)      | 0.0053                       |
| Component 5: Meat              | 5.5 (0.3)                   | 6.0 (0.3)      | 0.274                        | 4.5 (0.8)                      | 5.6 (0.8)      | 0.348                        |
| Component 6: Dairy             | 2.1 (0.2)                   | 2.8 (0.3)      | 0.046                        | 2.8 (0.6)                      | 3.2 (0.6)      | 0.675                        |
| Component 7: Water             | 5.0 (0.0)                   | 5.0 (0.0)      | -                            | 5.0 (0.0)                      | 5.0 (0.0)      | -                            |

|                            |            |            |        |            |            |        |
|----------------------------|------------|------------|--------|------------|------------|--------|
| Component 8: Fat           | 1.9 (0.2)  | 8.7 (0.1)  | <0.001 | 1.6 (0.4)  | 8.4 (0.3)  | <0.001 |
| Component 9: Sodium        | 7.5 (0.3)  | 10.0 (0.0) | <0.001 | 6.6 (0.7)  | 10.0 (0.0) | <0.001 |
| Component 10: Added sugars | 7.1 (0.3)  | 10.0 (0.0) | <0.001 | 7.7 (0.7)  | 10.0 (0.0) | 0.0014 |
| Component 11: Alcohol      | 5.0 (0.0)  | 5.0 (0.0)  | -      | 5.0 (0.0)  | 5.0 (0.0)  | -      |
| HEIFA-2013 TOTAL SCORE     | 47.4 (0.8) | 72.8 (0.8) | <0.001 | 46.1 (1.8) | 71.9 (2.0) | <0.001 |
| <b>NZEO</b>                |            |            |        |            |            |        |
| n                          | 91         | 91         |        | 120        | 120        |        |
| Component 1: Discretionary | 4.8 (0.5)  | 10.0 (0.0) | <0.001 | 5.3 (0.4)  | 10.0 (0.0) | <0.001 |
| Component 2: Vegetables    | 2.1 (0.2)  | 3.1 (0.3)  | 0.016  | 2.2 (0.2)  | 3.4 (0.2)  | 0.001  |
| Component 3: Fruits        | 2.2 (0.3)  | 5.8 (0.4)  | <0.001 | 3.1 (0.3)  | 6.4 (0.3)  | <0.001 |
| Component 4: Grains        | 2.7 (0.3)  | 5.5 (0.3)  | <0.001 | 3.2 (0.3)  | 5.7 (0.3)  | <0.001 |
| Component 5: Meat          | 3.3 (0.4)  | 4.1 (0.4)  | 0.182  | 3.3 (0.4)  | 4.3 (0.4)  | 0.074  |
| Component 6: Dairy         | 2.7 (0.3)  | 3.3 (0.4)  | 0.236  | 3.0 (0.3)  | 3.7 (0.3)  | 0.144  |
| Component 7: Water         | 5.0 (0.0)  | 5.0 (0.0)  | -      | 5.0 (0.0)  | 5.0 (0.0)  | -      |
| Component 8: Fat           | 1.8 (0.2)  | 7.7 (0.2)  | <0.001 | 1.8 (0.2)  | 7.6 (0.2)  | <0.001 |
| Component 9: Sodium        | 7.3 (0.4)  | 10.0 (0.0) | <0.001 | 6.1 (0.4)  | 9.9 (0.0)  | <0.001 |
| Component 10: Added sugars | 6.0 (0.5)  | 9.8 (0.1)  | <0.001 | 7.1 (0.4)  | 10.0 (0.0) | <0.001 |
| Component 11: Alcohol      | 5.0 (0.0)  | 5.0 (0.0)  | -      | 5.0 (0.0)  | 5.0 (0.0)  | -      |
| HEIFA-2013 TOTAL SCORE     | 42.9 (1.2) | 69.3 (1.1) | <0.001 | 45.3 (1.0) | 71.0 (1.0) | <0.001 |

<sup>1</sup> All scores are mean (SEM).

<sup>2</sup> Statistical significance is set at  $p < 0.05$ . A hyphen indicates that the values for comparison were exactly the same among all samples from within a group, and thus between both current vs healthier diets.

**B.**

| DICE Scores <sup>1</sup>            | Low socioeconomic household |                |                              | Medium socioeconomic household |                |                              |
|-------------------------------------|-----------------------------|----------------|------------------------------|--------------------------------|----------------|------------------------------|
|                                     | Current diet                | Healthier diet | <i>p</i> -value <sup>2</sup> | Current diet                   | Healthier diet | <i>p</i> -value <sup>2</sup> |
| <b>Maori</b>                        |                             |                |                              |                                |                |                              |
| n                                   | 194                         | 194            |                              | 67                             | 67             |                              |
| Component 1: Fruit                  | 9.4 (0.3)                   | 14.0 (0.2)     | <0.001                       | 10.0 (0.5)                     | 13.7 (0.3)     | <0.001                       |
| Component 2: Vegetables             | 4.1 (0.4)                   | 8.1 (0.3)      | <0.001                       | 4.2 (0.6)                      | 8.1 (0.6)      | <0.001                       |
| Component 3: Breads and cereals     | 5.4 (0.3)                   | 11.7 (0.3)     | <0.001                       | 4.8 (0.5)                      | 10.5 (0.5)     | <0.001                       |
| Component 4: Dairy and alternatives | 2.9 (0.2)                   | 3.5 (0.2)      | 0.055                        | 2.9 (0.3)                      | 3.2 (0.3)      | 0.613                        |
| Component 5: Protein foods          | 4.2 (0.3)                   | 6.2 (0.3)      | <0.001                       | 3.7 (0.5)                      | 5.2 (0.6)      | 0.061                        |
| Component 6: Number of meals        | 5.0 (0.0)                   | 5.0 (0.0)      | -                            | 5.0 (0.0)                      | 5.0 (0.0)      | -                            |
| Component 7: Fat                    | 1.0 (0.1)                   | 4.8 (0.1)      | <0.001                       | 1.6 (0.3)                      | 4.9 (0.1)      | <0.001                       |
| Component 8: Salt                   | 0.1 (0.1)                   | 1.3 (0.2)      | <0.001                       | 0.3 (0.1)                      | 1.4 (0.3)      | <0.001                       |
| Component 9: Sugar                  | 1.0 (0.1)                   | 4.9 (0.1)      | <0.001                       | 0.9 (0.2)                      | 5.0 (0.0)      | <0.001                       |
| Component 10: Beverages             | 4.9 (0.5)                   | 11.5 (0.3)     | <0.001                       | 6.0 (0.9)                      | 11.6 (0.5)     | <0.001                       |
| DICE TOTAL SCORE                    | 37.9 (0.9)                  | 70.9 (0.8)     | <0.001                       | 39.5 (1.8)                     | 68.7 (1.4)     | <0.001                       |
| <b>Pacific</b>                      |                             |                |                              |                                |                |                              |
| n                                   | 243                         | 243            |                              | 33                             | 33             |                              |
| Component 1: Fruit                  | 9.3 (0.3)                   | 13.6 (0.2)     | <0.001                       | 10.6 (0.7)                     | 14.0 (0.4)     | <0.001                       |
| Component 2: Vegetables             | 4.2 (0.3)                   | 8.4 (0.3)      | <0.001                       | 4.3 (0.9)                      | 8.6 (0.8)      | <0.001                       |
| Component 3: Breads and cereals     | 6.1 (0.3)                   | 12.1 (0.3)     | <0.001                       | 5.3 (0.7)                      | 11.4 (0.8)     | <0.001                       |
| Component 4: Dairy and alternatives | 1.9 (0.1)                   | 2.5 (0.2)      | 0.0130                       | 1.8 (0.4)                      | 2.3 (0.5)      | 0.460                        |
| Component 5: Protein foods          | 5.1 (0.3)                   | 6.5 (0.3)      | <0.001                       | 4.3 (0.8)                      | 6.2 (0.8)      | 0.109                        |
| Component 6: Number of meals        | 5.0 (0.0)                   | 5.0 (0.0)      | -                            | 5.0 (0.0)                      | 5.0 (0.0)      | -                            |
| Component 7: Fat                    | 1.3 (0.1)                   | 4.8 (0.1)      | <0.001                       | 1.2 (0.4)                      | 4.8 (0.2)      | <0.001                       |
| Component 8: Salt                   | 0.3 (0.1)                   | 1.6 (0.2)      | <0.001                       | 0.2 (0.2)                      | 0.9 (0.3)      | 0.050                        |
| Component 9: Sugar                  | 1.2 (0.1)                   | 4.9 (0.0)      | <0.001                       | 2.1 (0.4)                      | 5.0 (0.0)      | <0.001                       |
| Component 10: Beverages             | 6.8 (0.5)                   | 12.0 (0.2)     | <0.001                       | 5.9 (1.3)                      | 12.5 (0.6)     | <0.001                       |

|                                     |            |            |        |            |            |        |
|-------------------------------------|------------|------------|--------|------------|------------|--------|
| DICE TOTAL SCORE                    | 41.3 (0.8) | 71.3 (0.6) | <0.001 | 40.7 (2.6) | 70.8 (1.9) | <0.001 |
| <b>NZEO</b>                         |            |            |        |            |            |        |
| n                                   | 42         | 42         |        | 70         | 70         |        |
| Component 1: Fruit                  | 10.1 (0.6) | 14.2 (0.3) | <0.001 | 10.1 (0.5) | 13.6 (0.3) | <0.001 |
| Component 2: Vegetables             | 4.7 (0.8)  | 8.3 (0.7)  | <0.001 | 5.1 (0.6)  | 8.0 (0.5)  | <0.001 |
| Component 3: Breads and cereals     | 5.7 (0.7)  | 11.2 (0.7) | <0.001 | 5.6 (0.5)  | 10.6 (0.4) | <0.001 |
| Component 4: Dairy and alternatives | 3.4 (0.5)  | 4.6 (0.5)  | 0.112  | 3.0 (0.3)  | 3.2 (0.3)  | 0.686  |
| Component 5: Protein foods          | 3.7 (0.7)  | 5.5 (0.7)  | 0.069  | 4.0 (0.6)  | 5.6 (0.6)  | 0.051  |
| Component 6: Number of meals        | 5.0 (0.0)  | 5.0 (0.0)  | -      | 5.0 (0.0)  | 5.0 (0.0)  | -      |
| Component 7: Fat                    | 1.7 (0.4)  | 4.9 (0.1)  | <0.001 | 1.5 (0.3)  | 4.9 (0.1)  | <0.001 |
| Component 8: Salt                   | 0.2 (0.2)  | 1.4 (0.4)  | 0.003  | 0.1 (0.1)  | 1.6 (0.3)  | <0.001 |
| Component 9: Sugar                  | 0.7 (0.3)  | 5.0 (0.0)  | <0.001 | 1.1 (0.2)  | 5.0 (0.0)  | <0.001 |
| Component 10: Beverages             | 5.0 (1.1)  | 11.2 (0.6) | <0.001 | 4.5 (0.8)  | 11.0 (0.5) | <0.001 |
| DICE TOTAL SCORE                    | 40.3 (2.1) | 71.3 (1.6) | <0.001 | 39.9 (1.7) | 68.5 (1.3) | <0.001 |

<sup>1</sup> All scores are mean (SEM).

<sup>2</sup> Statistical significance is set at  $p < 0.05$ . A hyphen indicates that the values for comparison were exactly the same among all samples from within a group, and thus between both current vs healthier diets.
